# Supplementary material
Source: PubMed Central journal article supplement (PMC5472514)

# Improved Cough and Cough-Specific Quality of Life in Patients Treated for Scleroderma-Related Interstitial Lung Disease

## Results of Scleroderma Lung Study II

*Donald P. Tashkin, MD; Elizabeth R. Volkman, MD; Chi-Hong Tseng, PhD; Michael D. Roth, MD; Dinesh Khanna, MD; Daniel E. Furst, MD; Philip J. Clements, MD; Arthur Theodore, MD; Suzanne Kafaja, MD; Grace Hyun Kim, PhD; Jonathan Goldin, MD; Edgar Ariolla, PharmD; and Robert M. Elashoff, PhD*

CHEST 2017; 151(4):813-820

*Online supplements are not copyedited prior to posting and the author(s) take full responsibility for the accuracy of all data.*

© 2016 AMERICAN COLLEGE OF CHEST PHYSICIANS. Reproduction of this article is prohibited without written permission from the American College of Chest Physicians. See online for more details. DOI: 10.1016/j.chest.2016.11.052

## **e-Appendix 1.**

### **Justification for defining frequent cough (FC) based on the participant responses to the first two questions in the St. George's Respiratory Questionnaire (SGRQ):**

Analyzing data from 4513 subjects with COPD in the COPDGene cohort, Kim et al.<sup>1</sup> have compared different definitions of chronic bronchitis, including the classic definition (cough and sputum on most days for at least 3 months a year for at least 2 years) and a definition based on responses to the first two questions in the SGRQ (*1. Over the past 3 months, I have coughed a) most days a week b) several days a week c) a few days a month d) only with chest infections and e) not at all; 2. Over the past 3 months, I have brought up phlegm [sputum] a) most days a week b) several days a week c) a few days a month d) only with chest infections and e) not at all.*) They found striking similarities in the clinical, radiographic and physiologic characteristics between the two groups of patients with chronic bronchitis defined by these two definitions, a finding that is not surprising since the first two questions in the SGRQ correspond well to the classic definition, except for the fact that the time frame for the SGRQ is only the past 3 months. Since the SGRQ was administered to all SLS II participants, we relied on the first two questions concerning cough and sputum, respectively, to define "frequent cough" with or without frequent sputum. We avoided the term "chronic" in view of the time frame of the past 3 months, rather than the past 2 or more years used in the classic definition of "chronic bronchitis". We also avoided the term "bronchitis" since cough associated with ILD, unlike that associated with chronic obstructive pulmonary disease, is often dry (without sputum production) and, instead, characterized the cough as "dry" or "wet". Moreover, we believe that our distinction between "frequent" cough and non-frequent cough is justified in view of the large gap between "most" or "several" days a week (the first two response options to question 1 in the SGRQ) and only "a few days a month" or "only with chest infection" (the next two response options in the SGRQ), the last option being "not at all".

<sup>1</sup>**Kim V**, Crapo J, Zhao H, Jones PW, et al. Comparison between an alternative and the classic definition of chronic bronchitis in COPDGene. *Ann Am Thorac Soc.* 2015 Mar;12(3):332-9.

**e-Table 1.** Pearson correlations between cough-specific QoL (LCQ) scores and other baseline characteristics for patients with frequent cough at baseline

|                      |    | Pearson Correlation Coefficient |                 |                 |                 |
|----------------------|----|---------------------------------|-----------------|-----------------|-----------------|
| Baseline Features    | N  | total_lcq                       | Phys_lcq        | Psyc_lcq        | Soci_lcq        |
| Demographics         |    |                                 |                 |                 |                 |
| Age, yr              | 87 | -0.023                          | 0.002           | -0.059          | -0.007          |
| Height, cm           | 87 | -0.003                          | 0.005           | 0.023           | -0.014          |
| Weight, kg           | 87 | -0.107                          | -0.150          | -0.084          | -0.084          |
| Scleroderma features |    |                                 |                 |                 |                 |
| Raynauds, yrs        | 87 | -0.032                          | 0.020           | -0.003          | -0.107          |
| Non-Raynauds, yrs    | 87 | <b>-0.271*</b>                  | <b>-0.221*</b>  | <b>-0.298**</b> | <b>-0.238*</b>  |
| Skin score, mRSS     | 87 | 0.208                           | 0.243*          | 0.204           | 0.179           |
| Pulmonary function   |    |                                 |                 |                 |                 |
| FVC, % pred          | 87 | <b>0.232*</b>                   | 0.150           | <b>0.236*</b>   | <b>0.267*</b>   |
| DLCO, % pred         | 87 | <b>0.258*</b>                   | <b>0.211*</b>   | <b>0.28**</b>   | <b>0.212*</b>   |
| HRCT Scores          |    |                                 |                 |                 |                 |
| QLF_LM               | 83 | -0.173                          | -0.096          | -0.201          | -0.190          |
| QILD_LM              | 83 | -0.200                          | -0.177          | -0.217*         | -0.184          |
| QLF_WL               | 83 | <b>-0.245*</b>                  | -0.214          | <b>-0.258*</b>  | <b>-0.229*</b>  |
| QILD_WL              | 83 | <b>-0.25*</b>                   | <b>-0.294**</b> | <b>-0.252*</b>  | -0.183          |
| HRQOL                |    |                                 |                 |                 |                 |
| PCS_SF36             | 87 | <b>0.258*</b>                   | <b>0.378***</b> | <b>0.199</b>    | <b>0.171</b>    |
| MCS_SF36             | 87 | 0.210                           | 0.205           | 0.188           | 0.195           |
| HAQ-DI               | 87 | -0.036                          | -0.075          | 0.006           | -0.030          |
| Other symptoms       |    |                                 |                 |                 |                 |
| BDI                  | 80 | <b>0.389***</b>                 | <b>0.449***</b> | <b>0.347**</b>  | <b>0.315**</b>  |
| VAS breathing        | 87 | <b>-0.355***</b>                | <b>-0.333**</b> | <b>-0.269*</b>  | <b>-0.35***</b> |
| GERD score           | 87 | <b>-0.239*</b>                  | <b>-0.277**</b> | <b>-0.237*</b>  | <b>-0.185</b>   |

For definitions of abbreviations please see footnote to Table 1.

\* p<0.05; \*\*P<0.01; \*\*\*p<0.001

**e-Table 2.** Number of patients with cough and GERD data at both baseline and 24 months who reported frequent cough and/or GERD symptoms at each time point

|                                                         | GERD present at baseline, absent at 24 months | GERD absent at baseline, present at 24 months | GERD absence at baseline and 24 months | GERD present at baseline and 24 months |
|---------------------------------------------------------|-----------------------------------------------|-----------------------------------------------|----------------------------------------|----------------------------------------|
| Frequent cough present at baseline, absent at 24 months | 5                                             | 0                                             | 4                                      | 19                                     |
| Frequent cough present at both baseline and 24 months   | 3                                             | 7                                             | 3                                      | 25                                     |

**e-Table 3.** Mean ( $\pm$  SD) Leicester Cough Questionnaire (LCQ) scores (total and domain) at baseline and 24 months for both treatment arms separately and combined

|                                                   |                      | Both Treatment Arms Combined | CYC (N=32) | MMF(N=34)  |
|---------------------------------------------------|----------------------|------------------------------|------------|------------|
| Total_LCQ scores (scale 3-21)*                    | Baseline             | 15.4 (3.7)                   | 15.1 (3.6) | 15.6 (3.8) |
|                                                   | 24 months            | 16.7 (4.0)                   | 16.2 (4.3) | 17.1 (3.8) |
| $\Delta$ Total LCQ scores                         | Baseline - 24 months | 0.8 (3.8)                    | 0.8 (4.3)  | 0.9 (3.3)  |
|                                                   |                      |                              |            |            |
| Physical_LCQ scores (scale 1-7) <sup>†</sup>      | Baseline             | 4.91 (1.1)                   | 4.83 (1.1) | 4.99 (1.0) |
|                                                   | 24 months            | 5.32 (1.2)                   | 5.19 (1.3) | 5.45 (1.1) |
| $\Delta$ Physical LCQ scores <sup>§</sup>         | Baseline-24 months   | 0.3 (1.2)                    | 0.3 (1.3)  | 0.2 (1.1)  |
|                                                   |                      |                              |            |            |
| Psychological LCQ scores (scale 1-7) <sup>†</sup> | Baseline             | 5.20 (1.5)                   | 5.10 (1.5) | 5.26 (1.5) |
|                                                   | 24 months            | 5.70 (1.5)                   | 5.61 (1.5) | 5.71 (1.6) |
| $\Delta$ Psychological LCQ scores                 | Baseline-24 months   | 0.3 (1.5)                    | 0.3 (1.7)  | 0.2 (1.2)  |
|                                                   |                      | (1.5)                        |            |            |
| Social_LCQ scores (scale 1-7) <sup>†</sup>        | Baseline             | 5.31 (1.4)                   | 5.19 (1.3) | 5.44 (1.5) |
|                                                   | 24 months            | 5.68 (1.5)                   | 5.44 (1.7) | 5.92 (1.3) |
| $\Delta$ Social LCQ scores                        | Baseline-24 months   | 0.2 (1.5)                    | 0.1 (1.6)  | 0.3 (1.4)  |
|                                                   |                      |                              |            |            |

\*3=worst cough-specific QoL and 21=best; <sup>†</sup>1=worse QoL and 7=best

<sup>†</sup>1=worse QoL and 7=best

<sup>§</sup>None of the differences from baseline to 24 months are statistically significant

**e-Figure 1A.** Distribution of DLCO % predicted values and scores for BDI (total), breathing VAS and GERD (GIT-2) at baseline in patients stratified by the presence or absence of frequent cough.

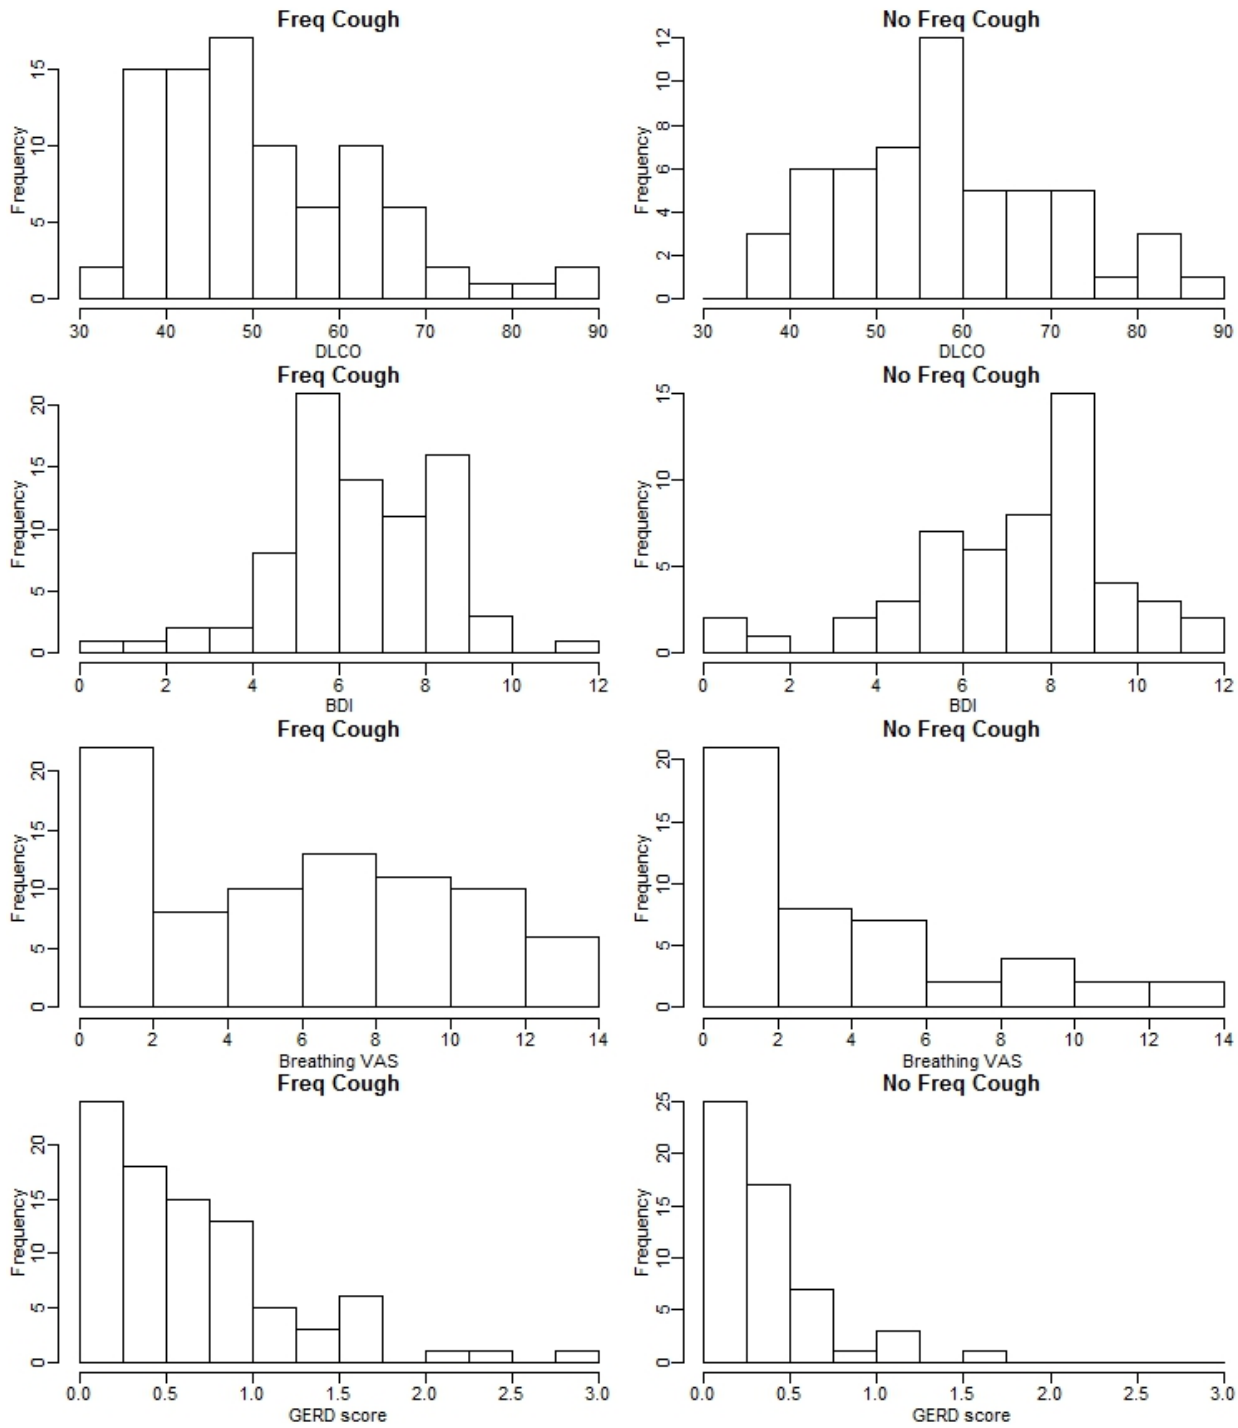

**e-Figure 1B.** Distribution of scores for quantitative lung fibrosis in the whole lung (QLF-WL), quantitative total ILD in the whole lung (QILD-WL), QLF in the lobe of maximal involvement (QLF-LM) and QILD in the lobe of maximal involvement (QILD-LM) at baseline in patients stratified by the presence or absence of frequent cough.

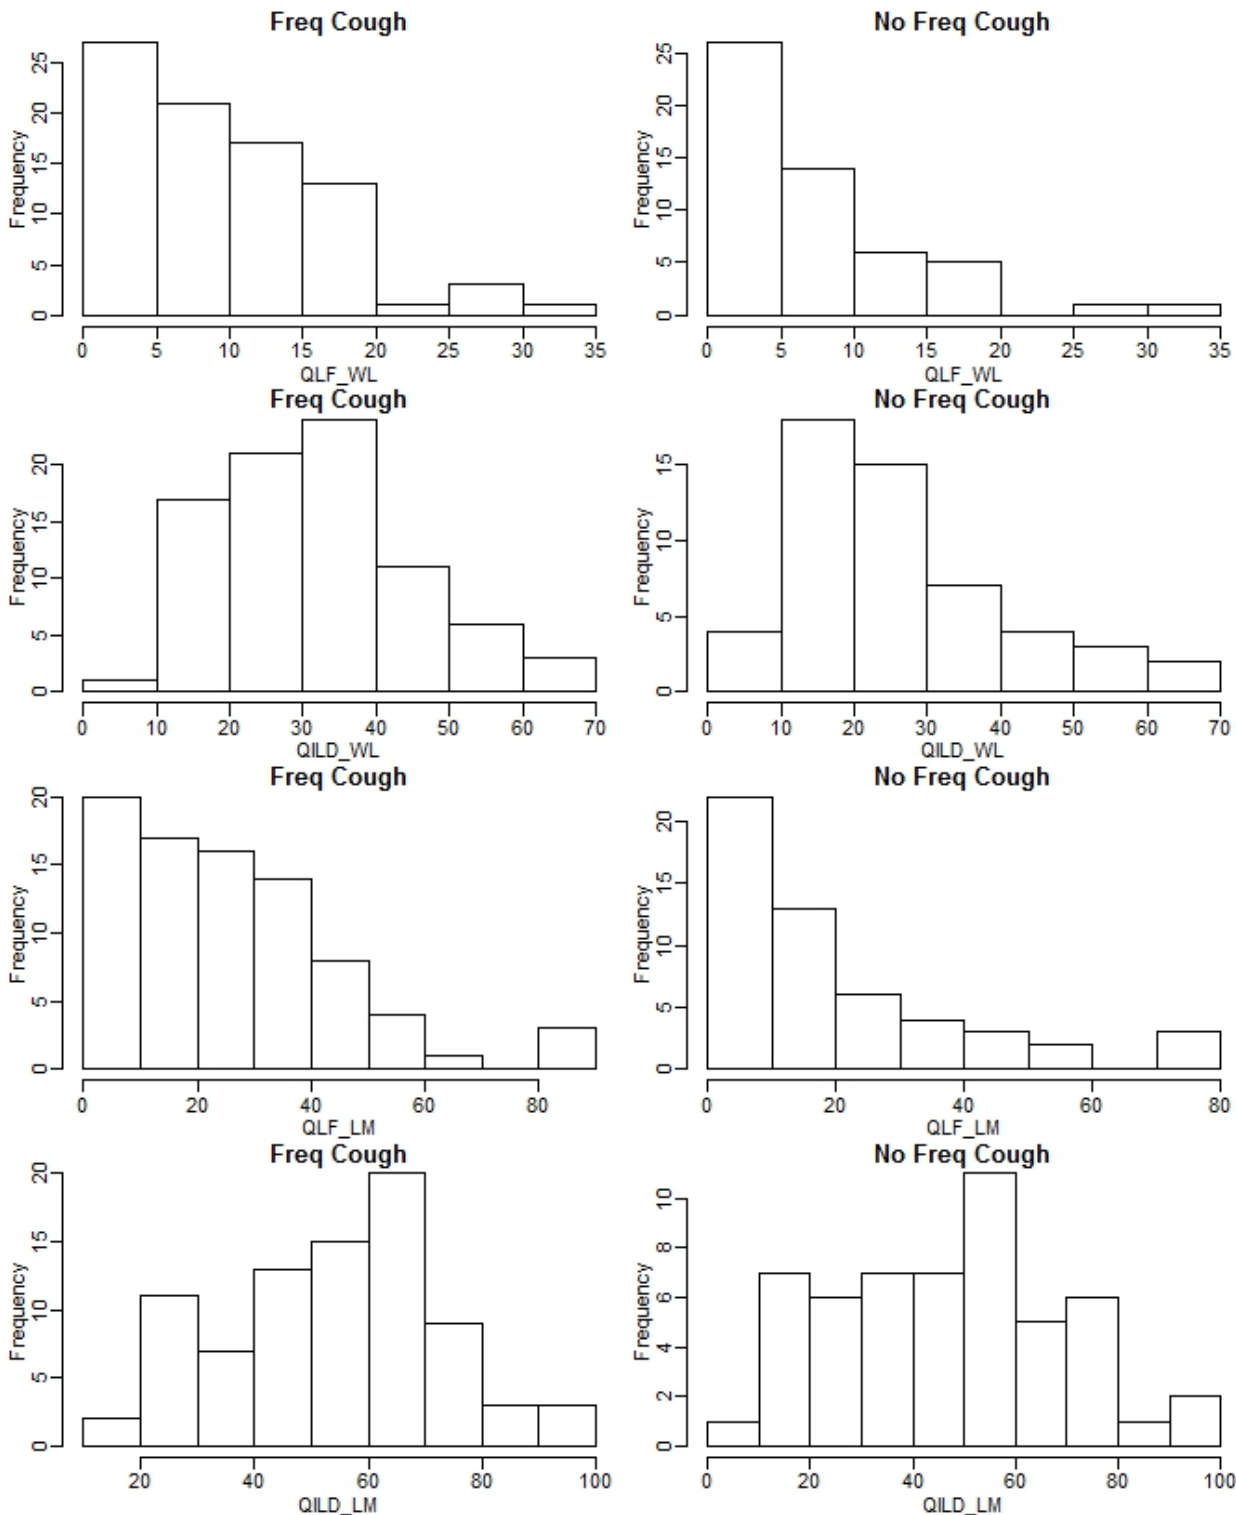

Supplement: mmc1.pdf [file mmc1.pdf]
